# Supplementary material for: Influence of storm type on compound flood drivers of a mid-latitude coastal urban environment
Source: Copernicus journal article supplement (doi:10.5194/hess-29-3101-2025), 2025-07-21
Supplement: Supplementary file 1 [file hess-29-3101-2025-supplement.pdf]

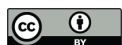

*Supplement of*

## **Influence of storm type on compound flood drivers of a mid-latitude coastal urban environment**

**Ziyu Chen et al.**

*Correspondence to:* Ziyu Chen (zychen1@qnlm.ac)

The copyright of individual parts of the supplement might differ from the article licence.

## Contents of supplementary material

Figures S1 to S4

Tables S1 to S3

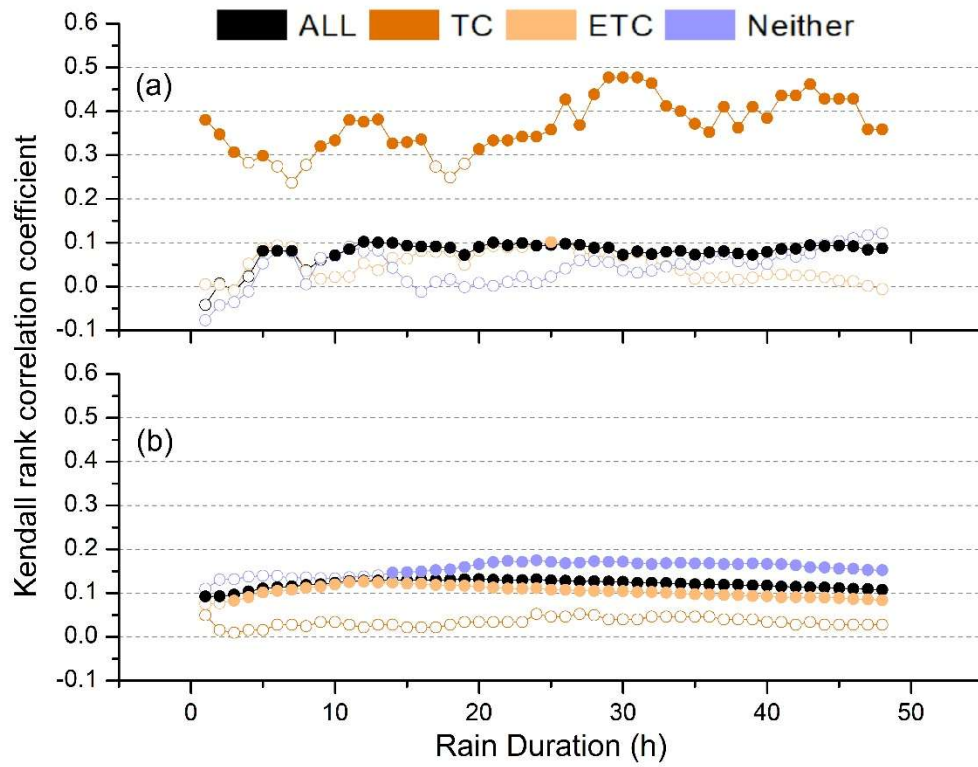

**Figure S1: The Kendall rank correlation coefficient between storm-duration maximum total rainfall (1- 48 hours) and NTR for P-C compound event (a) and C-P compound event (b) associated with different storm types for the Battery. The filled circles represent statistically significant cases ( $p < 0.05$ ).**

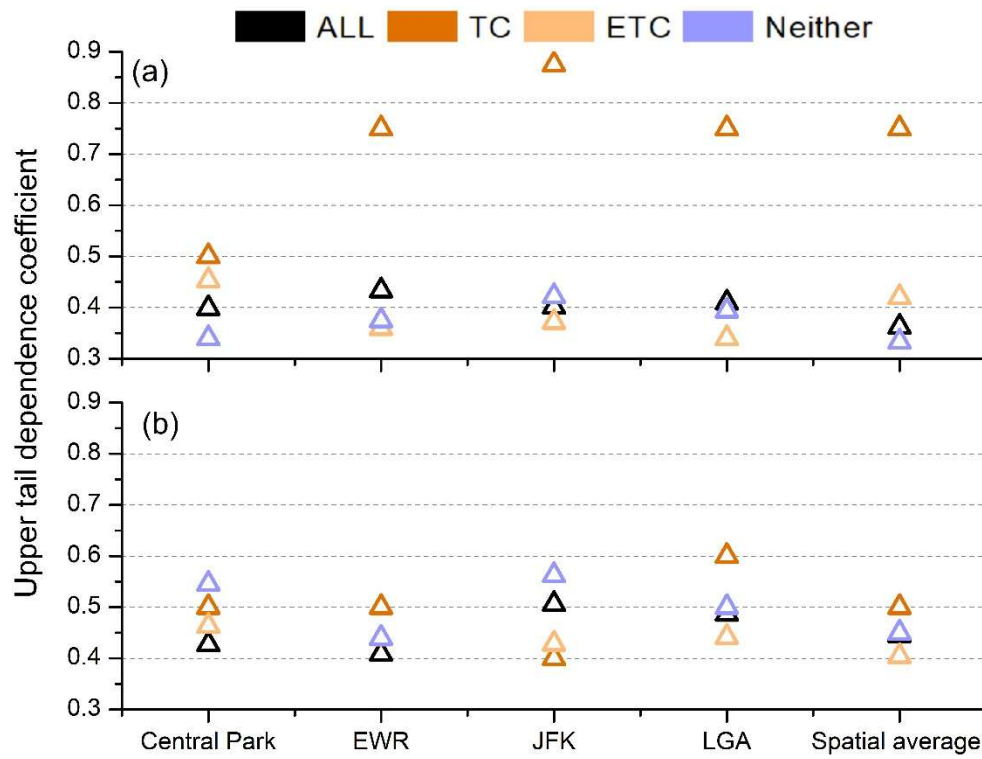

**Figure S2: The upper tail dependence coefficient above a threshold of 0.6 derived from the observed events associated with different storm types for (a) P-C simultaneous compound flood drivers and (b) C-P simultaneous compound flood drivers for each single gauge and the spatial average for the Battery.**

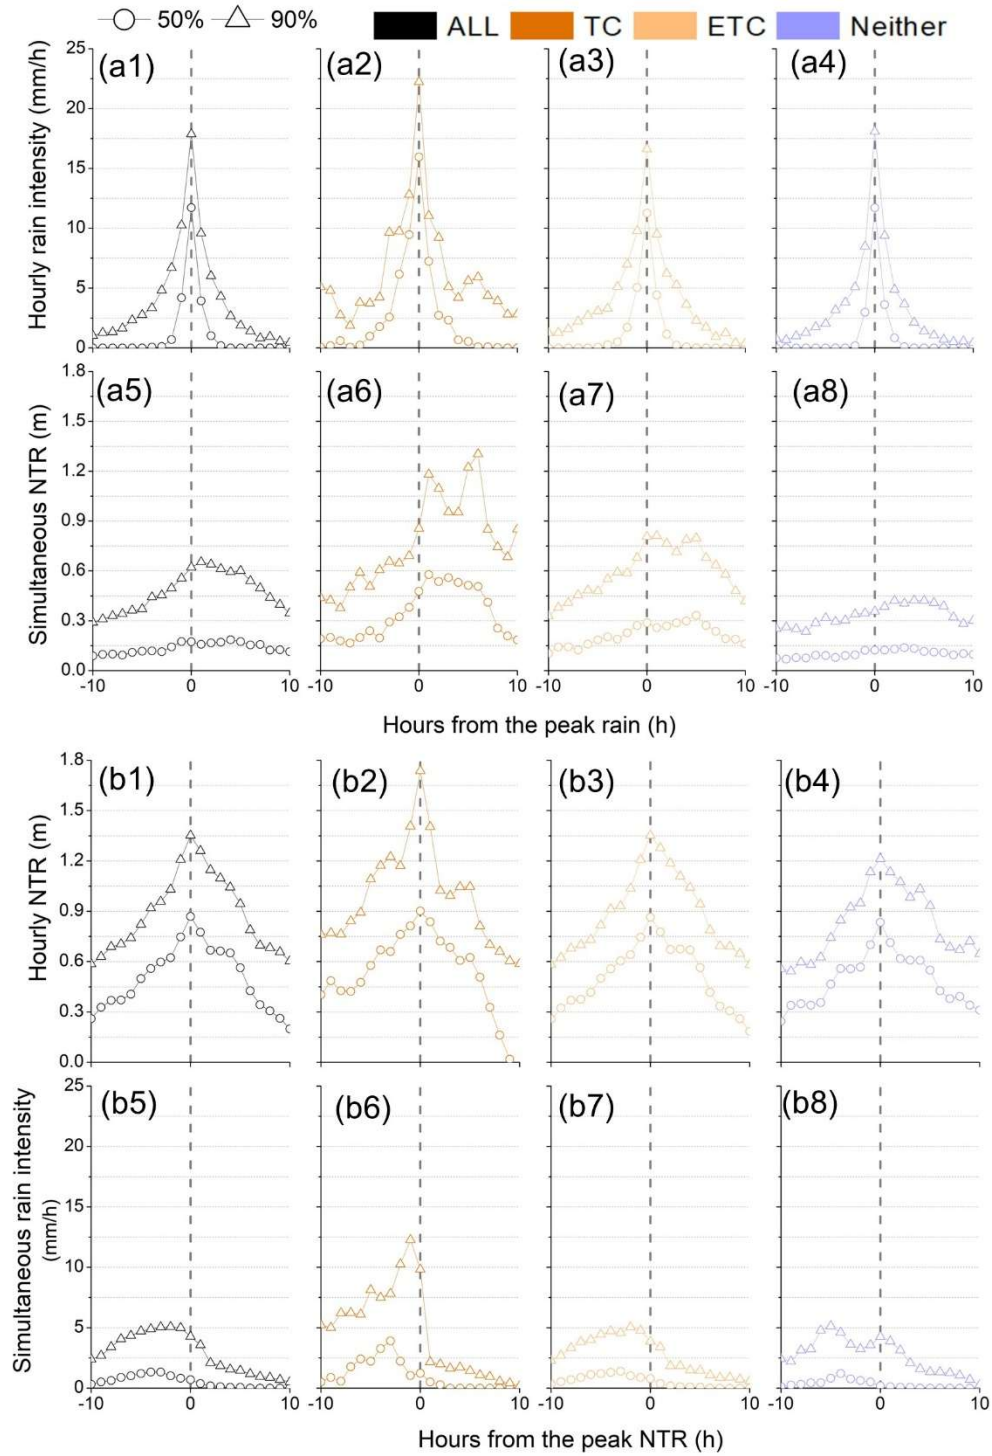

**Figure S3:** The magnitude of the P-C compound flood drivers (top; a1-a8) and the C-P compound flood drivers (bottom; b1-b8) by different storm types for Kings Point. The top row (a1-a4) and third row (b1-b4) show primary flood driver magnitudes (50th and 90th percentile), and the second row (a5-a8) and bottom row (b5-b8) show secondary flood driver magnitudes. The X-axis ranges from -10 to 10 h indicate time relative to the peak rain (top; a1-a8) or NTR (bottom; b1-b8).

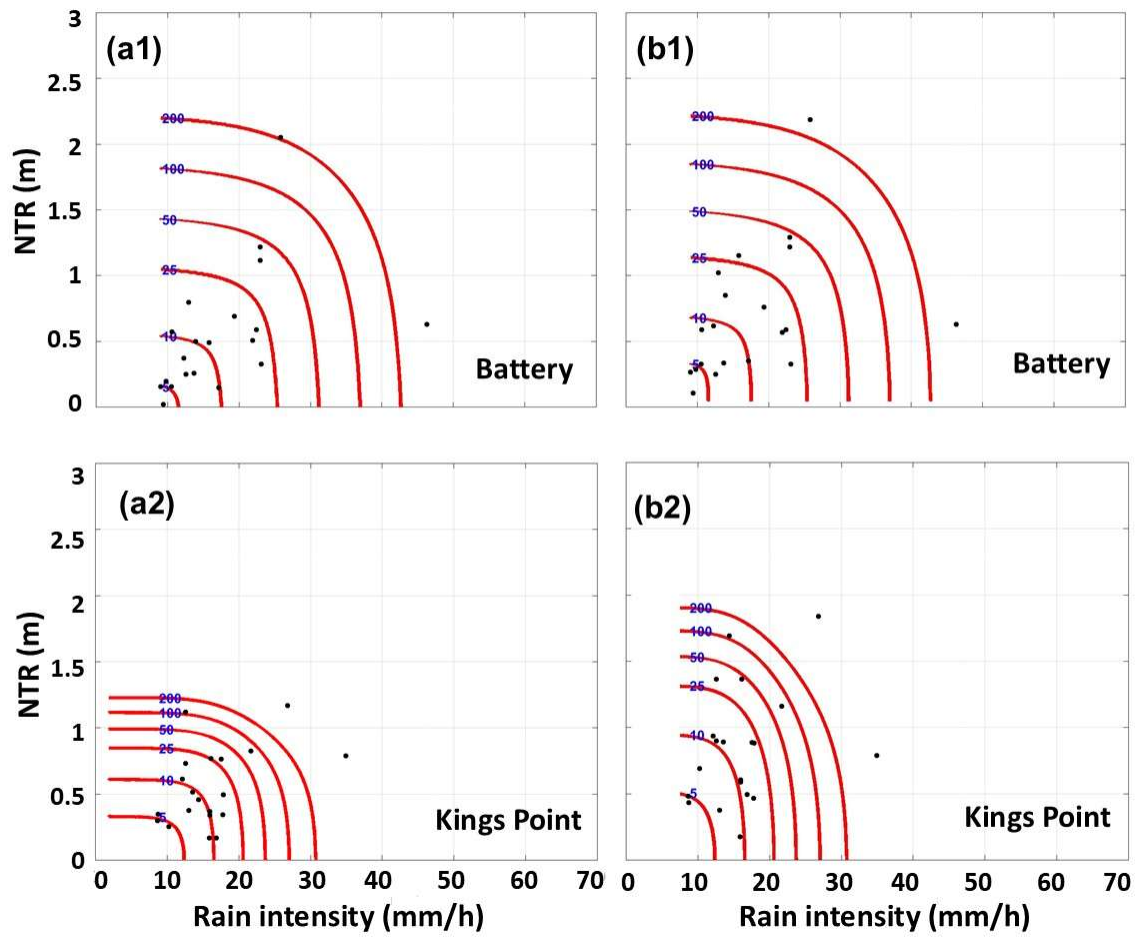

Figure S4: The joint return period curves (red lines, blue labels) for the P-C compound event associated with TC at the Battery (top) using simultaneous hourly flood drivers (a1) and storm-duration maximum flood drivers (b1). Similarly, for Kings Point (bottom). The black dot points are the observed events.

**Table S1: Statistical measures for the Plackett copula (selected from 25 copulas in MvCAT).**

| <b>Storm type</b> | <b>Scenarios</b>  | <b>Rank of BIC</b> | <b><math>p</math> for copulas</b> | <b>RMSE</b> | <b>NSE</b> |
|-------------------|-------------------|--------------------|-----------------------------------|-------------|------------|
| TC                | P-C Simultaneous  | 1                  | 0.98                              | 0.068       | 0.99       |
| TC                | P-C Storm maximum | 8                  | 0.35                              | 0.12        | 0.98       |
| ETC               | P-C Simultaneous  | 3                  | 0.99                              | 0.083       | 0.99       |
| Neither           | P-C Simultaneous  | 3                  | 0.35                              | 0.13        | 0.99       |
| All               | P-C Simultaneous  | 2                  | 0.77                              | 0.11        | 0.99       |
| TC                | C-P Simultaneous  | 2                  | 0.99                              | 0.071       | 0.99       |
| TC                | C-P Storm maximum | 6                  | 0.26                              | 0.13        | 0.98       |
| ETC               | C-P Simultaneous  | 3                  | 0.48                              | 0.12        | 0.99       |
| Neither           | C-P Simultaneous  | 7                  | 0.77                              | 0.10        | 0.99       |
| All               | C-P Simultaneous  | 7                  | 0.31                              | 0.13        | 0.99       |

**Table S2: The sensitivity analysis for the dependency of P-C simultaneous compound flood drivers and C-P simultaneous compound flood drivers associated with TC and ETC regarding different thresholds and distances for storm association at the Battery.**

|            |                            | P-C compound event                          |                                      |                                        |          | C-P compound event                          |                                      |                                        |          |
|------------|----------------------------|---------------------------------------------|--------------------------------------|----------------------------------------|----------|---------------------------------------------|--------------------------------------|----------------------------------------|----------|
| Storm type | Storm Association distance | PYA Threshold for All (year <sup>-1</sup> ) | PYA for TC/ETC (year <sup>-1</sup> ) | Kendall's rank correlation coefficient | <i>p</i> | PYA Threshold for All (year <sup>-1</sup> ) | PYA for TC/ETC (year <sup>-1</sup> ) | Kendall's rank correlation coefficient | <i>p</i> |
| TC         | 200 km                     | 5                                           | 0.09                                 | 0.62                                   | 0.07     | 5                                           | 0.16                                 | -0.15                                  | 0.54     |
| TC         | 350 km                     | 5                                           | 0.2                                  | 0.50                                   | 0.01     | 5                                           | 0.32                                 | 0.03                                   | 0.84     |
| TC         | 500 km                     | 5                                           | 0.27                                 | 0.52                                   | 0.001    | 5                                           | 0.35                                 | 0.01                                   | 0.93     |
| TC         | 500 km                     | 3                                           | 0.2                                  | 0.40                                   | 0.04     | 3                                           | 0.11                                 | -0.07                                  | 0.90     |
| TC         | 500 km                     | 4                                           | 0.22                                 | 0.34                                   | 0.06     | 4                                           | 0.15                                 | -0.05                                  | 0.88     |
| ETC        | 500 km                     | 5                                           | 0.84                                 | 0.05                                   | 0.56     | 5                                           | 2.48                                 | 0.12                                   | 0.01     |
| ETC        | 750 km                     | 5                                           | 1.33                                 | 0.02                                   | 0.77     | 5                                           | 3.2                                  | 0.13                                   | 0.002    |
| ETC        | 1000 km                    | 5                                           | 1.75                                 | 0.02                                   | 0.72     | 5                                           | 3.50                                 | 0.11                                   | 0.008    |
| ETC        | 1000 km                    | 3                                           | 0.91                                 | -0.03                                  | 0.68     | 3                                           | 1.68                                 | 0.09                                   | 0.15     |
| ETC        | 1000 km                    | 4                                           | 1.31                                 | -0.02                                  | 0.73     | 4                                           | 2.12                                 | 0.14                                   | 0.006    |

**Table S3: The breakdown of TCs, ETCs, and Neither for both the Battery and the Kings point stations in the past 75 years.**

|            |                            | The Battery                 |                    | Kings Point                 |                    |
|------------|----------------------------|-----------------------------|--------------------|-----------------------------|--------------------|
| Storm type | Storm Association distance | P-C compound event (1-hour) | C-P compound event | P-C compound event (1-hour) | C-P compound event |
| TC         | 500 km                     | 64                          | 97                 | 64                          | 99                 |
| ETC        | 1000 km                    | 2015                        | 2451               | 2026                        | 2480               |
| Neither    |                            | 2674                        | 3900               | 2631                        | 4219               |
